# Supplementary material
Source: Springer Nature journal article supplement (https://www.springermedizin.de/resource/supplementary/12955_2006_352_MOESM2_ESM.pdf/9560212)

Mean Difference in algorithm class

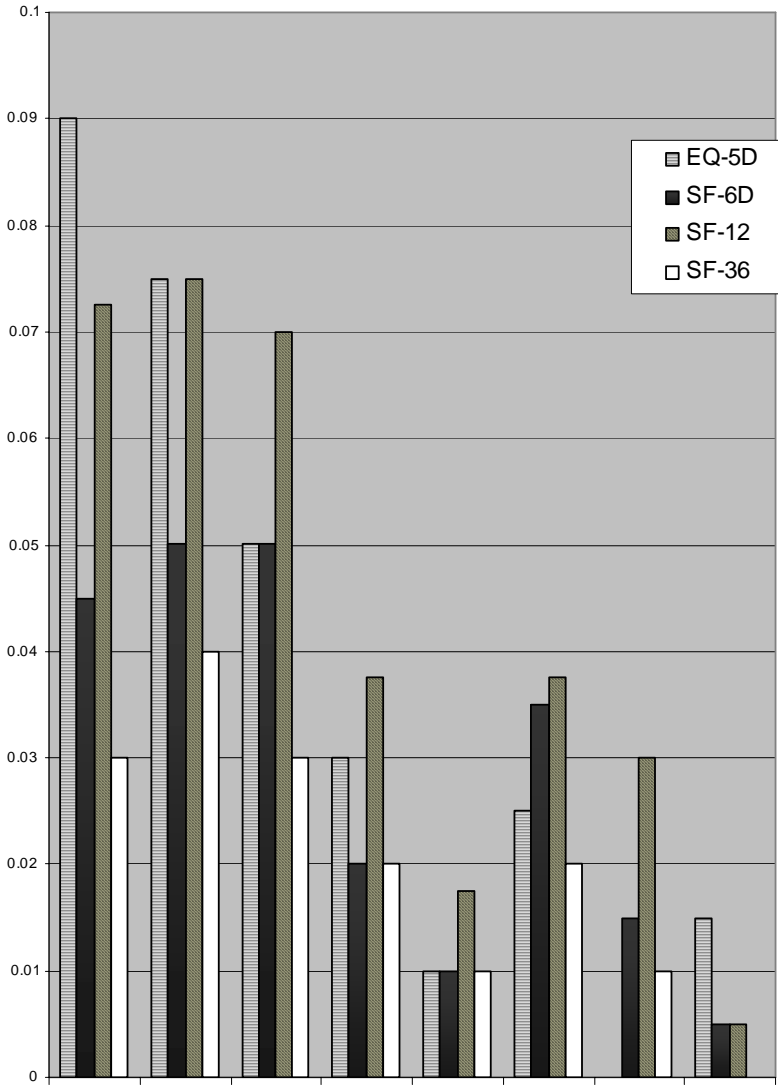

Medical Condition

Supplement: MOESM2 [file 9560212]
